# Supplementary material
Source: publisher figshare collection journal article supplement (https://asha.figshare.com/articles/dataset/_/20416107)
Supplement: Supplementary file 1 [file 1]

## Supplemental Material S2.

### Search Terms From Databases

| Database                                                                                                                                                          | Population                                                                                                                                                                                                                                                                          |                                                                                                                                                                            | Concept                                                                                                                                                                                                                        | Context                                                                                                                                                                                                                                                                                                                                                                                                                                                                                                                                  |
|-------------------------------------------------------------------------------------------------------------------------------------------------------------------|-------------------------------------------------------------------------------------------------------------------------------------------------------------------------------------------------------------------------------------------------------------------------------------|----------------------------------------------------------------------------------------------------------------------------------------------------------------------------|--------------------------------------------------------------------------------------------------------------------------------------------------------------------------------------------------------------------------------|------------------------------------------------------------------------------------------------------------------------------------------------------------------------------------------------------------------------------------------------------------------------------------------------------------------------------------------------------------------------------------------------------------------------------------------------------------------------------------------------------------------------------------------|
|                                                                                                                                                                   | Parent                                                                                                                                                                                                                                                                              | Young Children                                                                                                                                                             | Communication                                                                                                                                                                                                                  | Culture                                                                                                                                                                                                                                                                                                                                                                                                                                                                                                                                  |
| OVID Medline<br>Epub Ahead of<br>Print, In-Process<br>& Other Non-<br>Indexed<br>Citations, Ovid<br>MEDLINE(R)<br>Daily and Ovid<br>MEDLINE(R)<br>1946 to Present | Parenting/<br>exp Parent-Child<br>Relations/<br>Early Intervention,<br>Educational/<br><br>Parenting.mp.<br>Parent<br>training.mp.<br>Parent<br>coaching.mp.<br>Parent<br>education.mp.<br>Parent<br>mediated.mp.<br>Hanen*.mp.<br>Home<br>program*.mp.<br>early<br>intervention.mp | Child, Preschool/<br>Exp Infant/<br>Exp Child<br>Development/<br><br>Toddler*.mp.<br>Infant*.mp.<br>Preschool*.mp<br>Child<br>development.mp.<br>Infant<br>development.mp. | Language/<br>Exp<br>Communication<br>Disorders/<br>Exp Language<br>Disorders/<br>Social Skills/<br><br>Language.mp.<br>Communicat*.mp.<br>Social skill*.mp.<br>Pragmatic*.mp.<br>Communication<br>skill*.mp.                   | Exp Population<br>Groups<br>Culture/<br>Cultural Diversity/<br>Cultural<br>Characteristics/<br>Cross-Cultural<br>Comparison/<br>Cultural<br>Competency/<br>Ethnology/<br>Culturally Competent<br>Care/<br>Minority Groups/<br><br>Cultur*.mp.<br>Cross-cultur*.mp.<br>Cultural adapt*.mp.<br>Cultural<br>difference*.mp.<br>Asian cultur*.mp.<br>Arab* cultur*.mp.<br>African cultur*.mp.<br>Chinese cultur*.mp.<br>Indian cultur*.mp.<br>Indigenous.mp.<br>First nations.mp.<br>Torres strait.mp.<br>Aboriginal.mp.<br>Collectivis*.mp. |
| OVID Embase<br>1974 to 2020<br>September 04                                                                                                                       | Parenting/<br>exp Parent-Child<br>Relations/<br>Early Intervention,<br>Educational/<br><br>Parenting.mp.<br>Parent<br>training.mp.<br>Parent<br>coaching.mp.<br>Parent<br>education.mp.<br>Parent<br>mediated.mp.<br>Hanen*.mp.<br>Home<br>program*.mp.                             | Child, Preschool/<br>Exp Infant/<br>Exp Child<br>Development/<br><br>Toddler*.mp.<br>Infant*.mp.<br>Preschool*.mp<br>Child<br>development.mp.<br>Infant<br>development.mp. | Communication/<br>Language/<br>Exp<br>Communication<br>Disorders/<br>Exp Language<br>Disorders/<br>Social Skills/<br><br>Language.mp.<br>Communicat*.mp.<br>Social skill*.mp.<br>Pragmatic*.mp.<br>Communication<br>skill*.mp. | Exp Population<br>Groups<br>Culture/<br>Cultural Diversity/<br>Cultural<br>Characteristics/<br>Cross-Cultural<br>Comparison/<br>Cultural<br>Competency/<br>Ethnology/<br>Culturally Competent<br>Care/<br>Minority Groups/<br><br>Cultur*.mp.<br>Cross-cultur*.mp.<br>Cultural adapt*.mp.                                                                                                                                                                                                                                                |

|                                                                                                                             |                                                                                                                                                                                                                                                                                                       |                                                                                                                                                                                              |                                                                                                                                                                                                                                                                                                 |                                                                                                                                                                                                                                                                                                                                                                                                                                                                                                                                                                                                                |
|-----------------------------------------------------------------------------------------------------------------------------|-------------------------------------------------------------------------------------------------------------------------------------------------------------------------------------------------------------------------------------------------------------------------------------------------------|----------------------------------------------------------------------------------------------------------------------------------------------------------------------------------------------|-------------------------------------------------------------------------------------------------------------------------------------------------------------------------------------------------------------------------------------------------------------------------------------------------|----------------------------------------------------------------------------------------------------------------------------------------------------------------------------------------------------------------------------------------------------------------------------------------------------------------------------------------------------------------------------------------------------------------------------------------------------------------------------------------------------------------------------------------------------------------------------------------------------------------|
|                                                                                                                             | early intervention.mp                                                                                                                                                                                                                                                                                 |                                                                                                                                                                                              |                                                                                                                                                                                                                                                                                                 | Cultural difference*.mp.<br><br>Asian cultur*.mp.<br>Arab* cultur*.mp.<br>African cultur*. mp.<br>Chinese cultur*. mp.<br>Indian cultur*.mp.<br>Indigenous.mp.<br>First nations.mp.<br>Torres strait.mp.<br>Aboriginal.mp.<br>Collectivis*.mp.                                                                                                                                                                                                                                                                                                                                                                 |
| APA PsycInfo<br>1987 to August<br>Week 5 2020<br><br>*note: PsycInfo auto explodes, so have to indicate when not to explode | Parenting/<br>Exp Parent-Child Relations/<br>Exp Parent Child Communication/<br>Early Intervention/<br>Parent Training/<br><br>Parenting.mp.<br>Parent training.mp.<br>Parent coaching.mp.<br>Parent education.mp.<br>Parent mediated.mp.<br>Hanen*.mp.<br>Home program*.mp.<br>early intervention.mp | Exp Preschool Students/<br>Kindergarten Students/<br>Exp Early Childhood Development/<br><br>toddler*.mp.<br>Infant*.mp.<br>Preschool*.mp<br>Child development.mp.<br>Infant development.mp. | Communication/<br>Nonverbal Communication/<br>Verbal communication/<br>Social Communication/<br>Language/<br>Communication Disorders/<br>exp Language Disorders/<br>language therapy/<br><br>Language.mp.<br>Communicat*.mp.<br>Social skill*.mp.<br>Pragmatic*.mp.<br>Communication skill*.mp. | Exp "Racial and Ethnic Groups"/<br>"Racial and Ethnic Differences"/<br>Sociocultural factors/<br>Cross cultural differences/<br>Ethnic values/<br>Cross Cultural Communication/<br>Exp Cross Cultural Treatment/<br>"Culture (Anthropological)"/<br>Minority Groups/<br>Cultural sensitivity/<br><br>Cultur*.mp.<br>Cross-cultur*.mp.<br>Cultural adapt*.mp.<br>Cultural difference*.mp.<br><br>Asian cultur*.mp.<br>Arab* cultur*.mp.<br>African cultur*. mp.<br>Chinese cultur*. mp.<br>Indian cultur*.mp.<br>Indigenous.mp.<br>First nations.mp.<br>Torres strait.mp.<br>Aboriginal.mp.<br>Collectivis*.mp. |
| CINAHL<br><br>Instead of .mp., automatically the default is "title, abstract, subject headings"                             | (MH "Parenting")<br>(MH "Parent-Child Relations")+<br>(MH "Parent-Infant Relations")<br>(MH "Early Childhood Intervention")<br>(MH "Early Intervention")                                                                                                                                              | (MH "Child, Preschool")<br>(MH "Infant+")<br>(MH "Child Development")<br><br>"toddler*" "<br>"infant*" "<br>"preschool*" "                                                                   | (MH "Communication")<br>(MH "Communicative Disorders+")<br>(MH "Language")<br>(MH "Language Disorders+")                                                                                                                                                                                        | MH "Ethnic Groups+)"<br>(MH "Minority Groups")<br>(MH "Culture")<br>(MH "cultural diversity")<br>(MH "cultural values")<br>(MH "ethnology")                                                                                                                                                                                                                                                                                                                                                                                                                                                                    |

|  |                                                                                                                                                                                |                                                        |                                                                                                                                                                                                                               |                                                                                                                                                                                                                                                                                                                                                                                                     |
|--|--------------------------------------------------------------------------------------------------------------------------------------------------------------------------------|--------------------------------------------------------|-------------------------------------------------------------------------------------------------------------------------------------------------------------------------------------------------------------------------------|-----------------------------------------------------------------------------------------------------------------------------------------------------------------------------------------------------------------------------------------------------------------------------------------------------------------------------------------------------------------------------------------------------|
|  | <p>"parent training"</p> <p>"parent coaching"</p> <p>Hanen*</p> <p>"home program"</p> <p>"parent education"</p> <p>"early intervention"</p> <p>"parent mediated" parenting</p> | <p>"child development"</p> <p>"infant development"</p> | <p>(MH "Communication Skills Training")</p> <p>(MH "Social Skills Training")</p> <p>"Social communication"</p> <p>"communicat*"</p> <p>"language"</p> <p>"social skill*"</p> <p>"pragmatic"</p> <p>"communication skill*"</p> | <p>(MH "Cultural Competence")</p> <p>(MH "Indigenous Peoples+")</p> <p>"cultur*"</p> <p>"cross-cultur*"</p> <p>"cultural adapt*"</p> <p>"cultural difference*"</p> <p>"Arab cultur*"</p> <p>"Asian cultur*"</p> <p>"African cultur*"</p> <p>"Chinese cultur*"</p> <p>"Indian cultur*"</p> <p>collectivis*</p> <p>"indigenous"</p> <p>"first nations"</p> <p>"torres strait"</p> <p>"aboriginal"</p> |
|--|--------------------------------------------------------------------------------------------------------------------------------------------------------------------------------|--------------------------------------------------------|-------------------------------------------------------------------------------------------------------------------------------------------------------------------------------------------------------------------------------|-----------------------------------------------------------------------------------------------------------------------------------------------------------------------------------------------------------------------------------------------------------------------------------------------------------------------------------------------------------------------------------------------------|

## Inclusion and Exclusion Criteria

| a) Primary agent of intervention is parents or guardians                                                                                                                                                                                                                                                  |                                                                                                                                                                                                                                                    |                                                                                                                                                                                                                                                                                                                                                                                                                                                                                                                                                                                                                                                                                             |
|-----------------------------------------------------------------------------------------------------------------------------------------------------------------------------------------------------------------------------------------------------------------------------------------------------------|----------------------------------------------------------------------------------------------------------------------------------------------------------------------------------------------------------------------------------------------------|---------------------------------------------------------------------------------------------------------------------------------------------------------------------------------------------------------------------------------------------------------------------------------------------------------------------------------------------------------------------------------------------------------------------------------------------------------------------------------------------------------------------------------------------------------------------------------------------------------------------------------------------------------------------------------------------|
| Inclusion                                                                                                                                                                                                                                                                                                 | Exclusion                                                                                                                                                                                                                                          | Notes                                                                                                                                                                                                                                                                                                                                                                                                                                                                                                                                                                                                                                                                                       |
| Parent training                                                                                                                                                                                                                                                                                           | - Primary agents of intervention anyone besides parents or guardians.<br>- Parents not mentioned in abstract                                                                                                                                       | Parents and caregivers should be primary agents of the intervention. At <b>title/abstract</b> , if parents are mentioned as being involved in the intervention, include. At <b>full text</b> , we will assess whether parents are focal agents in the intervention (more than 50% of intervention delivered by parents)                                                                                                                                                                                                                                                                                                                                                                     |
| Parent coaching                                                                                                                                                                                                                                                                                           |                                                                                                                                                                                                                                                    |                                                                                                                                                                                                                                                                                                                                                                                                                                                                                                                                                                                                                                                                                             |
| Home program                                                                                                                                                                                                                                                                                              |                                                                                                                                                                                                                                                    |                                                                                                                                                                                                                                                                                                                                                                                                                                                                                                                                                                                                                                                                                             |
| Parent education                                                                                                                                                                                                                                                                                          |                                                                                                                                                                                                                                                    |                                                                                                                                                                                                                                                                                                                                                                                                                                                                                                                                                                                                                                                                                             |
| Parent-led early intervention                                                                                                                                                                                                                                                                             |                                                                                                                                                                                                                                                    |                                                                                                                                                                                                                                                                                                                                                                                                                                                                                                                                                                                                                                                                                             |
| b) Communication Intervention                                                                                                                                                                                                                                                                             |                                                                                                                                                                                                                                                    |                                                                                                                                                                                                                                                                                                                                                                                                                                                                                                                                                                                                                                                                                             |
| Inclusion                                                                                                                                                                                                                                                                                                 | Exclusion                                                                                                                                                                                                                                          | Notes                                                                                                                                                                                                                                                                                                                                                                                                                                                                                                                                                                                                                                                                                       |
| Communication                                                                                                                                                                                                                                                                                             | - Exclude interventions when communication/social skills are not listed as AIMS or OUTCOMES by the authors (e.g., physical, solely behavioural, nutrition, parent mental health or coping) focused<br>- Assessments                                | <b>Behavioural intervention:</b> Include behaviour interventions at the <b>title/abstract</b> level. At <b>full text</b> , we will assess whether the intervention includes communication aspects as a stated aim or outcome.<br><br>- For social skills intervention, there needs to be evidence at full text that 'social skills' refers to social communication.<br><br><b>Types of studies:</b> At the level of <b>title/abstract</b> , any study discussing an intervention which has been adapted will be included. This includes qualitative studies, protocols for future studies, or other designs. At <b>full text</b> , we will assess if the study has quantitative components. |
| Language                                                                                                                                                                                                                                                                                                  |                                                                                                                                                                                                                                                    |                                                                                                                                                                                                                                                                                                                                                                                                                                                                                                                                                                                                                                                                                             |
| Pragmatics                                                                                                                                                                                                                                                                                                |                                                                                                                                                                                                                                                    |                                                                                                                                                                                                                                                                                                                                                                                                                                                                                                                                                                                                                                                                                             |
| Social Skills                                                                                                                                                                                                                                                                                             |                                                                                                                                                                                                                                                    |                                                                                                                                                                                                                                                                                                                                                                                                                                                                                                                                                                                                                                                                                             |
| Speech                                                                                                                                                                                                                                                                                                    |                                                                                                                                                                                                                                                    |                                                                                                                                                                                                                                                                                                                                                                                                                                                                                                                                                                                                                                                                                             |
| Communication needs to be stated as an aim <u>OR</u> outcome of the intervention                                                                                                                                                                                                                          |                                                                                                                                                                                                                                                    |                                                                                                                                                                                                                                                                                                                                                                                                                                                                                                                                                                                                                                                                                             |
| c) Young child(ren)                                                                                                                                                                                                                                                                                       |                                                                                                                                                                                                                                                    |                                                                                                                                                                                                                                                                                                                                                                                                                                                                                                                                                                                                                                                                                             |
| Inclusion                                                                                                                                                                                                                                                                                                 | Exclusion                                                                                                                                                                                                                                          | Notes                                                                                                                                                                                                                                                                                                                                                                                                                                                                                                                                                                                                                                                                                       |
| At least some of the children in the sample are under age 5:0                                                                                                                                                                                                                                             | None of the sample is under the age of 5:0                                                                                                                                                                                                         | - At <b>title/abstract</b> , If the abstract refers to 'child/children', 'school age children', or the other terms listed, we will include at and determine at <b>full text</b> whether the sample has any children under age 5:0.                                                                                                                                                                                                                                                                                                                                                                                                                                                          |
| Uses terms preschooler, toddler, kindergarten, but does not specify age.                                                                                                                                                                                                                                  |                                                                                                                                                                                                                                                    |                                                                                                                                                                                                                                                                                                                                                                                                                                                                                                                                                                                                                                                                                             |
| d) Intervention implemented in a different culture                                                                                                                                                                                                                                                        |                                                                                                                                                                                                                                                    |                                                                                                                                                                                                                                                                                                                                                                                                                                                                                                                                                                                                                                                                                             |
| Inclusion                                                                                                                                                                                                                                                                                                 | Exclusion                                                                                                                                                                                                                                          | Notes                                                                                                                                                                                                                                                                                                                                                                                                                                                                                                                                                                                                                                                                                       |
| Authors state an intention to implement the intervention with a cultural group different than the group it was originally designed for.<br>Examples include <ul style="list-style-type: none"><li>interventions implemented with immigrant families (different culture within the same country)</li></ul> | - Adaptation is not related to cultural adaptation (e.g., age group, gender, child diagnosis, modality).<br>- Low socioeconomic status, without mention of cultural differences.<br><br>- Exclude multiple studies with the same sample (e.g., two | - At <b>title/abstract</b> , all articles that state or give any indication that an intervention was delivered/implemented/adapted in a sample of a different culture will be included. At <b>full text</b> , articles will be assessed as to whether the cultural differences fit with the chosen definition of culture/cultural adaptation.                                                                                                                                                                                                                                                                                                                                               |

|                                                                                                                                                                                                                                                                                                                                                                                                            |                                                                                                                                                                                                                                                                                                 |  |
|------------------------------------------------------------------------------------------------------------------------------------------------------------------------------------------------------------------------------------------------------------------------------------------------------------------------------------------------------------------------------------------------------------|-------------------------------------------------------------------------------------------------------------------------------------------------------------------------------------------------------------------------------------------------------------------------------------------------|--|
| <ul style="list-style-type: none"> <li>interventions implemented in a different country and the countries' values, customs, norms, practices, language, or other features (APA 2003, p. 380) are expected to be substantially different from the original group.</li> <li>Interventions implemented with indigenous populations when the original intervention was not designed for this group.</li> </ul> | <p>studies using the identical data set and sample, but reporting different outcomes). Select <b>one study</b> that is most relevant to the research question.</p> <p>- Only language translation if no mention of cultural differences (e.g., translated from English to French in Canada)</p> |  |
|------------------------------------------------------------------------------------------------------------------------------------------------------------------------------------------------------------------------------------------------------------------------------------------------------------------------------------------------------------------------------------------------------------|-------------------------------------------------------------------------------------------------------------------------------------------------------------------------------------------------------------------------------------------------------------------------------------------------|--|

**e) Additional Exclusion Criteria:**

- Only include articles published after 1995 (year the EVF framework was published)
- Exclude if full text not in English and no translation available
- Exclude multiple studies using same sample (e.g., 2 studies using the identical data set and sample, but reporting different outcomes). Select **one study** that is most relevant to the research question.
- Types of evidence to exclude:
  - conference abstracts, dissertations, book chapters, commentaries/perspective articles, systematic and scoping reviews, studies with only qualitative components (as we cannot analyze using EVF criteria)
